# Supplementary material for: Role of the JP45-Calsequestrin Complex on Calcium Entry in Slow Twitch Skeletal Muscles
Source: PubMed Central journal article supplement (PMC4938177; doi:10.1074/jbc.m115.709071), 2016-05-04

### Supplementary Figure 1

Representative western blots on total SR preparations from WT mice stained with the specified antibodies: anti-RyR1, 7.5  $\mu$ g SR protein; anti-Cav1.1, 10  $\mu$ g SR protein ; anti-JP45, 10  $\mu$ g SR protein ; anti-SERCA1, 5  $\mu$ g SR protein; anti-SERCA2, 5  $\mu$ g SR protein ; anti-calreticulin, 20  $\mu$ g SR protein; anti-sarcalumenin, 10  $\mu$ g SR protein ; anti-albumin, 5  $\mu$ g SR protein ; anti-beta1, 10  $\mu$ g SR protein. Immunostaining was performed as described in the methods section.

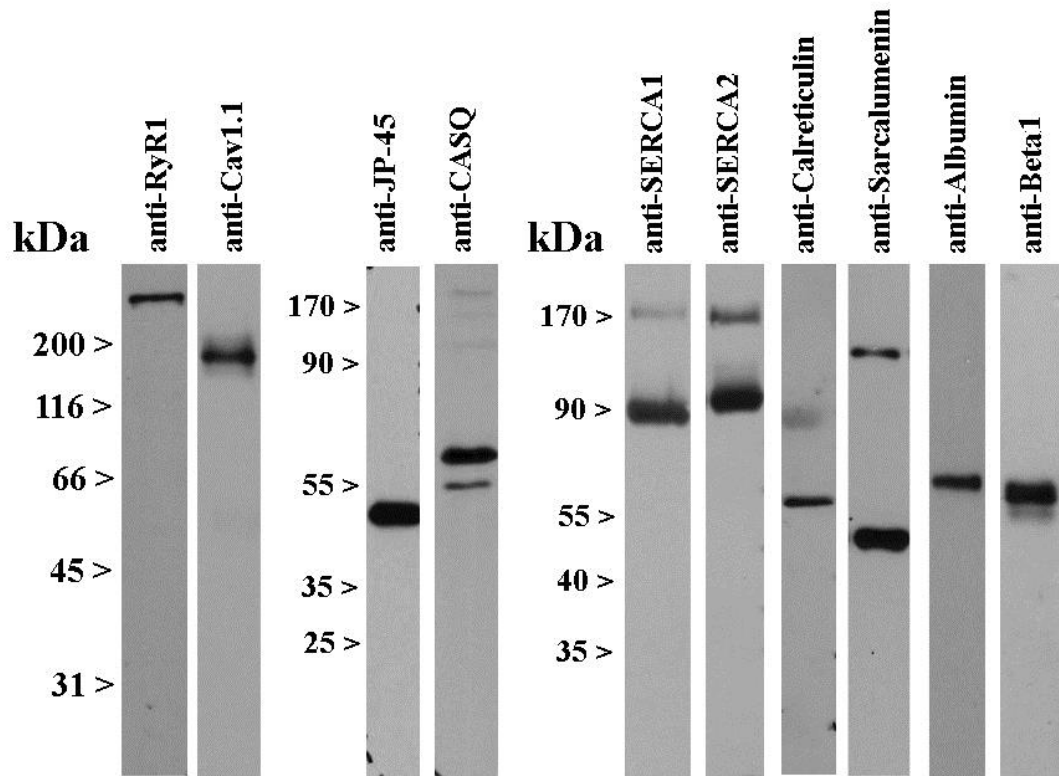

Supplement: 10.1074_M115.709071_jbc.M115.709071-1.pdf [file 10.1074_M115.709071_jbc.M115.709071-1.pdf]
